# Supplementary material for: Prion-Seeding Activity in Cerebrospinal Fluid of Deer with Chronic Wasting Disease
Source: PLoS One. 2013 Nov 25;8(11):e81488. doi: 10.1371/journal.pone.0081488 (PMC3839929; doi:10.1371/journal.pone.0081488)
Supplement: Table S2 — Comparison of predictor models to estimate sPMCAb and RT-QuIC scores. Models represent logistic regressions of all individual and pair-wise combinations of predictors, and are ranked from most parsimonious to least parsimonious by ∆AICc. 1=Inoculum (blood and blood products, environment, urine/feces, negative, brain, saliva), 2=IHC, 3=Genotype (GG/GS), 4=Month sample was tonsil biopsy positive (by IHC), 5=Incubation period (months), and 6=Duration of clinical signs (weeks). K=number of model parameters, w=model weight, r2=McFadden’s r2. (XLSX) [file pone.0081488.s002.xlsx]

## Sheet: Sheet1
PMCA							QuIC
Model	K	AICc	∆AICc	w	r2		Model	K	AICc	∆AICc	w	r2
2+6	2	34.71	0	0.269	0.248		2+4	2	22.491	0	0.337	0.374
2	1	36.101	1.391	0.134	0.185		2	1	24.487	1.997	0.124	0.267
2+3	2	36.251	1.541	0.124	0.212		2+6	2	25.052	2.561	0.094	0.29
2+5	2	36.272	1.562	0.123	0.211		2+5	2	25.391	2.9	0.079	0.279
2+4	2	36.893	2.183	0.09	0.196		4	1	25.472	2.982	0.076	0.235
6	1	38.49	3.78	0.041	0.128		2+3	2	25.771	3.28	0.065	0.266
5+6	2	38.76	4.05	0.035	0.151		3+4	2	25.948	3.457	0.06	0.261
4+6	2	38.786	4.076	0.035	0.151		4+6	2	26.423	3.932	0.047	0.245
1+2	2	39.138	4.428	0.029	0.238		4+5	2	26.66	4.169	0.042	0.237
4+5	2	39.724	5.014	0.022	0.128		1+2	2	27.368	4.878	0.029	0.345
3+6	2	39.748	5.038	0.022	0.128		1+4	2	29.47	6.98	0.01	0.276
5	1	39.847	5.137	0.021	0.095		3+6	2	29.948	7.457	0.008	0.13
4	1	40.232	5.521	0.017	0.086		6	1	30.017	7.526	0.008	0.086
3+5	2	41.008	6.298	0.012	0.097		1+3	2	30.768	8.278	0.005	0.234
3+4	2	41.475	6.765	0.009	0.086		5+6	2	30.954	8.463	0.005	0.097
1+5	2	42.724	8.014	0.005	0.152		3	1	31.748	9.257	0.003	0.029
1+6	2	43.244	8.534	0.004	0.14		5	1	33.163	10.673	0.002	0.017
3	1	43.798	9.088	0.003	0		1	1	33.254	10.763	0.002	0.111
1+4	2	44.347	9.637	0.002	0.113		3+5	2	33.593	11.102	0.001	0.01
1	1	44.629	9.919	0.002	0.076		1+6	2	34.14	11.65	0.001	0.123
1+3	2	45.728	11.018	0.001	0.08		1+5	2	34.996	12.505	0.001	0.095
